# Supplementary material for: RE2(MO4)3:Ln3+ (RE = Y, La, Gd, Lu; M = W, Mo; Ln = Eu, Sm, Dy) microcrystals: controlled synthesis, microstructure and tunable luminescence
Source: Royal Society of Chemistry journal article supplement (doi:10.1039/c3ce40495a), 2013-01-01
Supplement: c3ce40495a.pdf [file c3ce40495a.pdf]

## Supporting Information

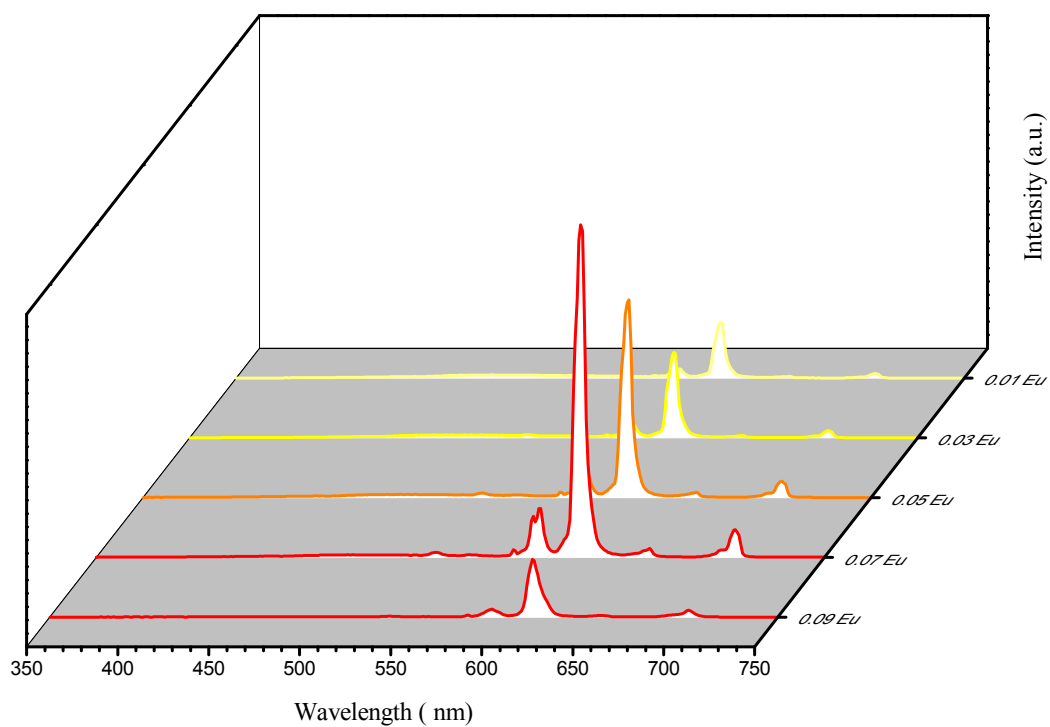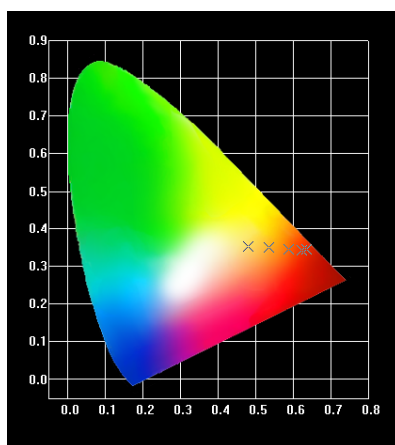

**Figure S1** The emission spectra of  $\text{La}_2(\text{WO}_4)_3:\text{Eu}^{3+}$  samples with different  $\text{Eu}^{3+}$  doping concentration, and the inset is the corresponding CIE diagram (x, from left to right, from 0.01  $\text{Eu}^{3+}$  to 0.09  $\text{Eu}^{3+}$ ).

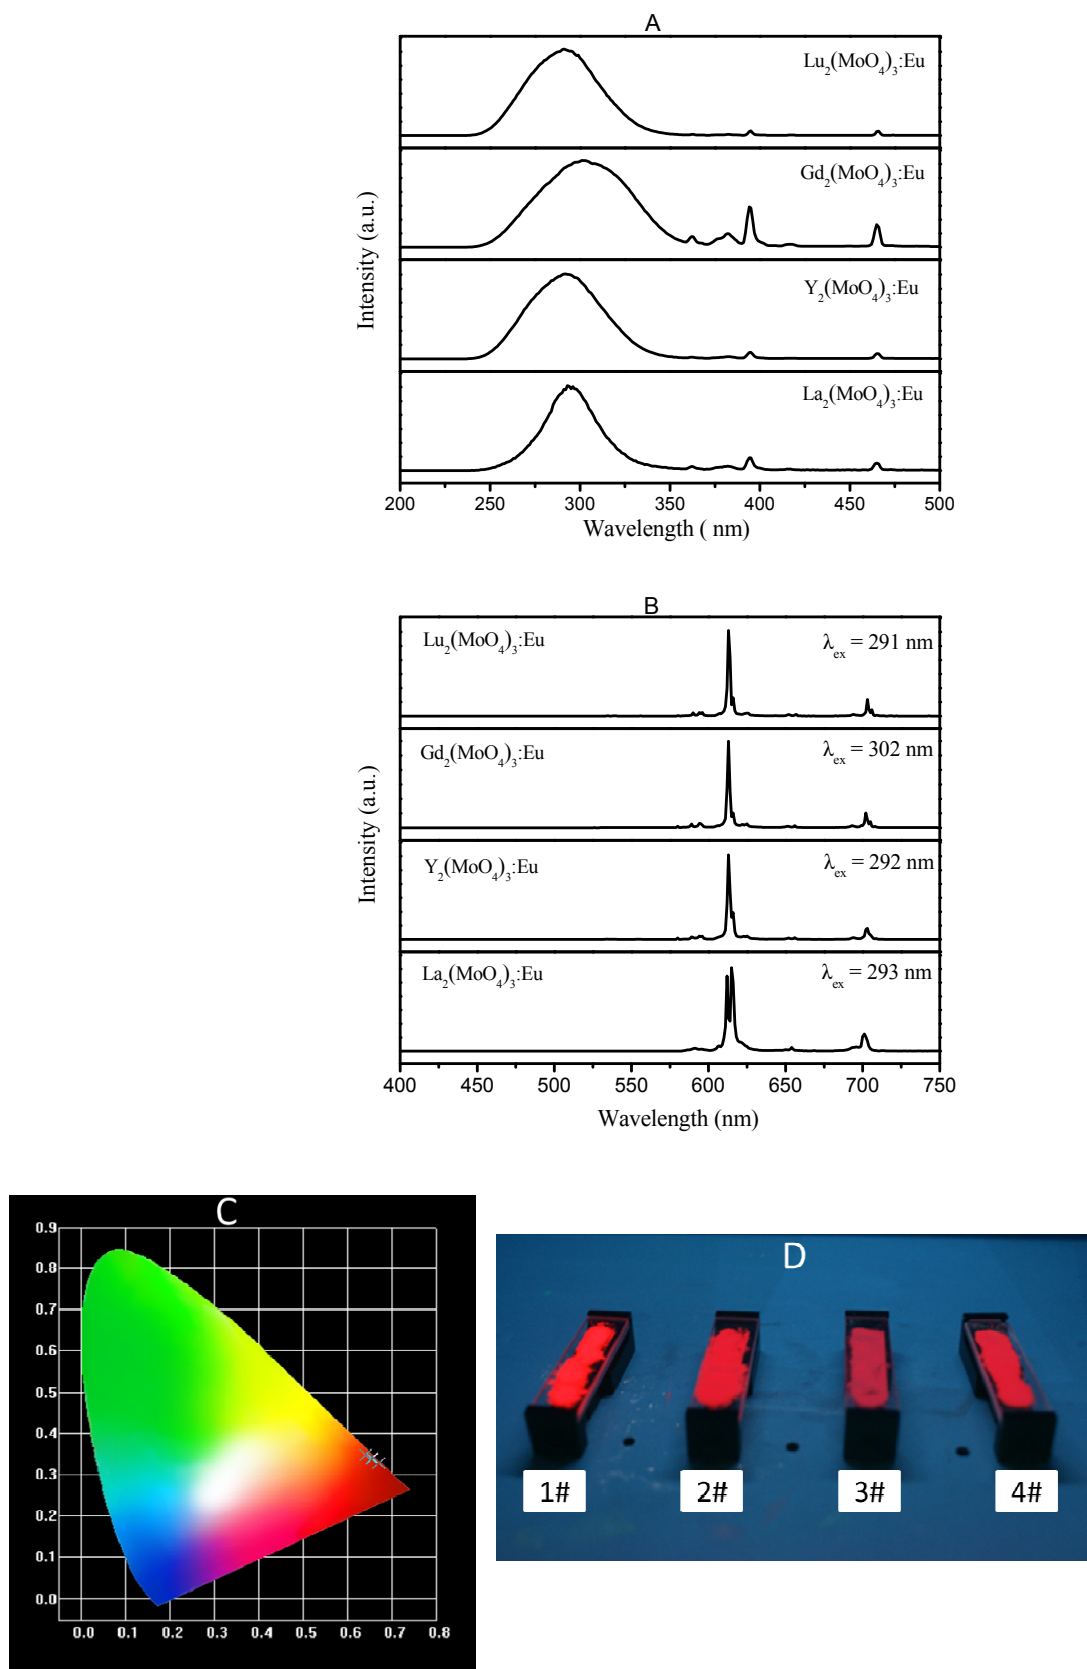

**Figure S2** Luminescent properties of  $\text{RE}_2(\text{MoO}_4)_3: 2\% \text{Eu}^{3+}$  (RE = La, Y, Gd, Lu): (A) excitation spectra ( $\lambda_{\text{em}} = 613 \text{ nm}$ ), (B) emission spectra ( $\lambda_{\text{ex}}$  labeled in the figure), (C) CIE chromaticity diagram (×, from left to right, from 1# to 4#), and (D) the luminescence photographs irradiated under a UV lamp.

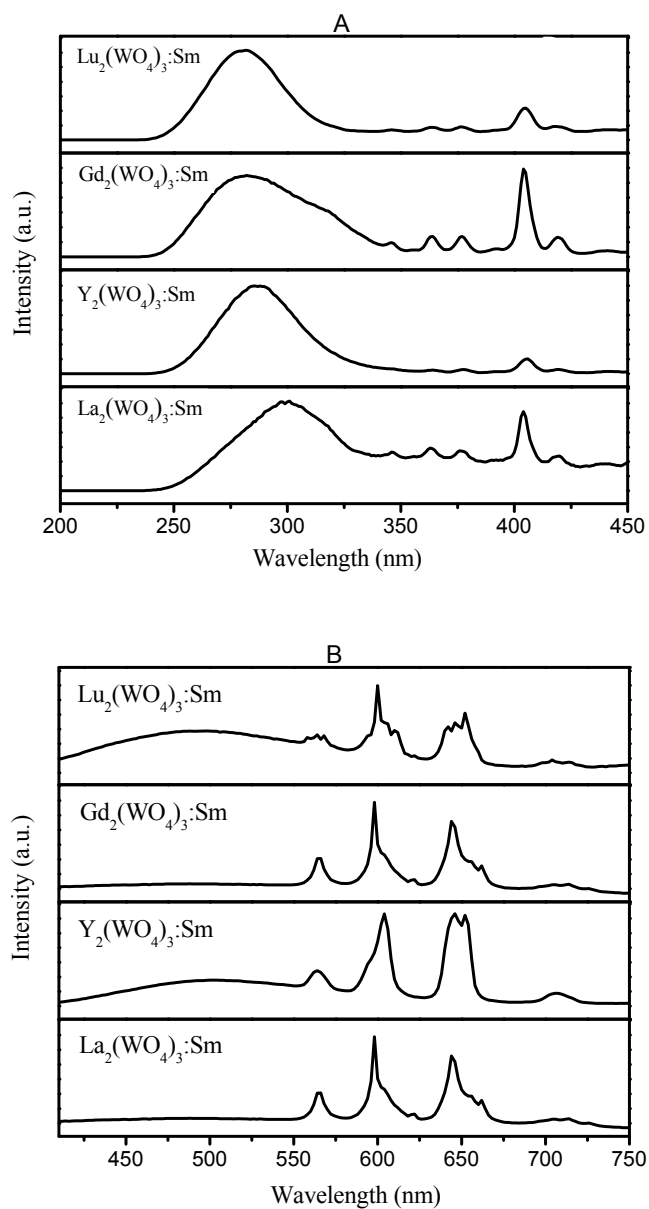

**Figure S3** Excitation spectra ( $\lambda_{\text{em}} = 600 \text{ nm}$ ) of  $\text{RE}_2(\text{MoO}_4)_3:\text{Sm}^{3+}$  (RE = La, Y, Gd, Lu).

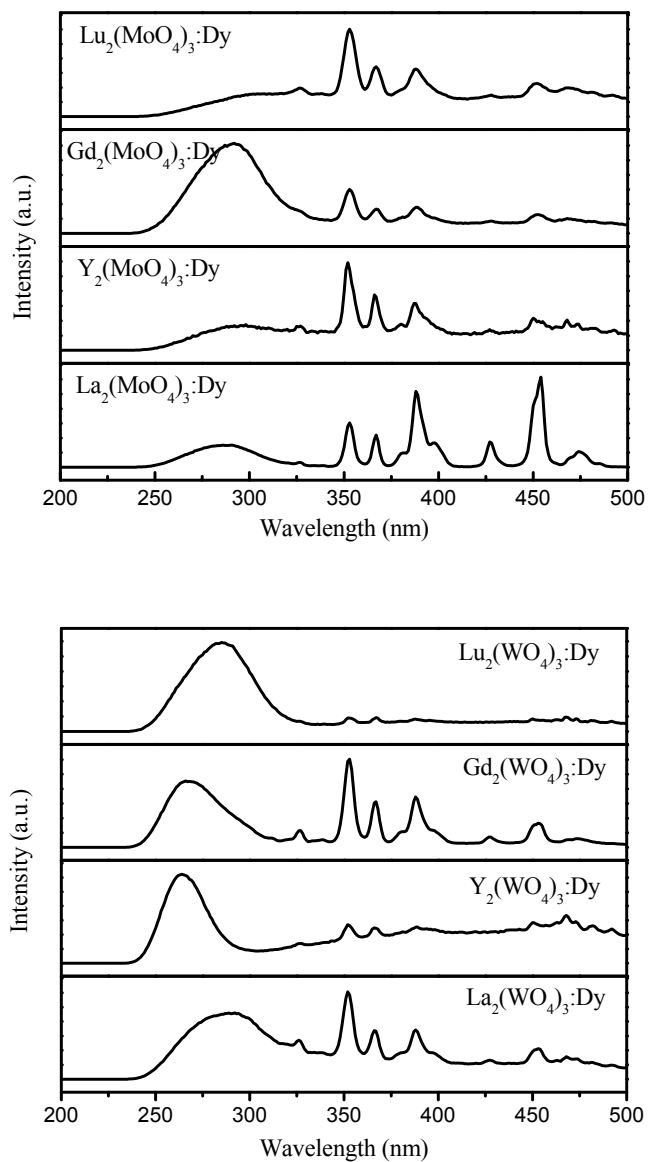

**Figure S4** Excitation spectra ( $\lambda_{\text{em}} = 600 \text{ nm}$ ) of  $\text{RE}_2(\text{MoO}_4)_3:\text{Dy}^{3+}$  (RE = La, Y, Gd, Lu).

**Table S1** The doping concentration of the Ln<sup>3+</sup> in RE<sub>2</sub>(MO<sub>4</sub>)<sub>3</sub> (RE = Y, La, Gd, Lu; M = W, Mo; Ln = Eu, Sm, Dy) microcrystals

| RE <sub>2</sub> (MO <sub>4</sub> ) <sub>3</sub> :Ln <sup>3+</sup>  | Doping concentration of Ln <sup>3+</sup> (molar ratio) | RE <sub>2</sub> (MO <sub>4</sub> ) <sub>3</sub> :Ln <sup>3+</sup>  | Doping concentration of Ln <sup>3+</sup> (molar ratio) |
|--------------------------------------------------------------------|--------------------------------------------------------|--------------------------------------------------------------------|--------------------------------------------------------|
| La <sub>2</sub> (WO <sub>4</sub> ) <sub>3</sub> :Eu <sup>3+</sup>  | ~0.02                                                  | Y <sub>2</sub> (WO <sub>4</sub> ) <sub>3</sub> :Sm <sup>3+</sup>   | ~0.02                                                  |
| Gd <sub>2</sub> (WO <sub>4</sub> ) <sub>3</sub> :Eu <sup>3+</sup>  | ~0.02                                                  | Lu <sub>2</sub> (WO <sub>4</sub> ) <sub>3</sub> :Sm <sup>3+</sup>  | ~0.02                                                  |
| Y <sub>2</sub> (WO <sub>4</sub> ) <sub>3</sub> :Eu <sup>3+</sup>   | ~0.02                                                  | La <sub>2</sub> (MoO <sub>4</sub> ) <sub>3</sub> :Sm <sup>3+</sup> | ~0.02                                                  |
| Lu <sub>2</sub> (WO <sub>4</sub> ) <sub>3</sub> :Eu <sup>3+</sup>  | ~0.02                                                  | Gd <sub>2</sub> (MoO <sub>4</sub> ) <sub>3</sub> :Sm <sup>3+</sup> | ~0.02                                                  |
| La <sub>2</sub> (MoO <sub>4</sub> ) <sub>3</sub> :Eu <sup>3+</sup> | ~0.02                                                  | Y <sub>2</sub> (MoO <sub>4</sub> ) <sub>3</sub> :Sm <sup>3+</sup>  | ~0.02                                                  |
| Gd <sub>2</sub> (MoO <sub>4</sub> ) <sub>3</sub> :Eu <sup>3+</sup> | ~0.02                                                  | Lu <sub>2</sub> (MoO <sub>4</sub> ) <sub>3</sub> :Sm <sup>3+</sup> | ~0.02                                                  |
| Y <sub>2</sub> (MO <sub>4</sub> ) <sub>3</sub> :Eu <sup>3+</sup>   | ~0.02                                                  | La <sub>2</sub> (WO <sub>4</sub> ) <sub>3</sub> :Dy <sup>3+</sup>  | ~0.02                                                  |
| Lu <sub>2</sub> (MoO <sub>4</sub> ) <sub>3</sub> :Eu <sup>3+</sup> | ~0.02                                                  | Gd <sub>2</sub> (WO <sub>4</sub> ) <sub>3</sub> :Dy <sup>3+</sup>  | ~0.02                                                  |
| La <sub>2</sub> (WO <sub>4</sub> ) <sub>3</sub> :Eu <sup>3+</sup>  | ~0.02                                                  | Y <sub>2</sub> (WO <sub>4</sub> ) <sub>3</sub> :Dy <sup>3+</sup>   | ~0.02                                                  |
| La <sub>2</sub> (WO <sub>4</sub> ) <sub>3</sub> :Eu <sup>3+</sup>  | ~0.03                                                  | Lu <sub>2</sub> (WO <sub>4</sub> ) <sub>3</sub> :Dy <sup>3+</sup>  | ~0.02                                                  |
| La <sub>2</sub> (WO <sub>4</sub> ) <sub>3</sub> :Eu <sup>3+</sup>  | ~0.05                                                  | La <sub>2</sub> (MoO <sub>4</sub> ) <sub>3</sub> :Dy <sup>3+</sup> | ~0.02                                                  |
| La <sub>2</sub> (WO <sub>4</sub> ) <sub>3</sub> :Eu <sup>3+</sup>  | ~0.07                                                  | Gd <sub>2</sub> (MoO <sub>4</sub> ) <sub>3</sub> :Dy <sup>3+</sup> | ~0.02                                                  |
| La <sub>2</sub> (WO <sub>4</sub> ) <sub>3</sub> :Sm <sup>3+</sup>  | ~0.09                                                  | Y <sub>2</sub> (MoO <sub>4</sub> ) <sub>3</sub> :Dy <sup>3+</sup>  | ~0.02                                                  |
| Gd <sub>2</sub> (WO <sub>4</sub> ) <sub>3</sub> :Sm <sup>3+</sup>  | ~0.02                                                  | Lu <sub>2</sub> (MoO <sub>4</sub> ) <sub>3</sub> :Dy <sup>3+</sup> | ~0.02                                                  |
